# Supplementary material
Source: PubMed Central journal article supplement (PMC5954994)
Supplement: NIHMS962714-supplement-2.pdf [file NIHMS962714-supplement-2.pdf]

## MEMORY SURVEY-TIME 2

This survey will ask about your thoughts and memories from the 2013 Boston marathon bombings. You may skip any questions you do not wish to answer, although we hope that you will answer all questions. Any and all information collected in this study will be kept confidential so you should not include your name on this survey.

Please answer each question to the best of your knowledge as completely as possible. If you do not know/remember the answer to a question, please indicate so. **Do NOT ask someone else for the answer.**

### General Questions

Today's date: \_\_\_\_\_

Your age: \_\_\_\_\_

Your gender: \_\_\_\_\_

Ethnic Background

- a. Hispanic
- b. Not Hispanic
- c. Prefer not to answer

Racial Background (circle the most appropriate letter)

- a. American Indian or Alaskan Native
- b. Asian or Pacific Islander
- c. African-American, Black (not Hispanic origin)
- d. Caucasian, White (not Hispanic origin)
- e. Other
- f. Prefer not to answer

**QUESTIONS BELOW REFER TO THE EVENTS SURROUNDING THE 2013 BOSTON MARATHON**

*When you think about the week following the bombings, what are the first three images that come to mind?*

*What is image 1?*

- a. Is this an image you saw at the time the event occurred or an image that you have seen since the time of the event?*
  
- b. Where did you initially see this image?*
  
- c. When you picture this image, do you imagine it from your own eyes (i.e., as you saw it originally) or do you picture yourself in the image?*

*2. Image 2?*

- a. Is this an image you saw at the time the event occurred or an image that you have seen since the time of the event?*
  
- b. Where did you initially see this image?*
  
- c. When you picture this image, do you imagine it from your own eyes (i.e., as you saw it originally) or do you picture yourself in the image?*

3. *Image 3?*

- a. *Is this an image you saw at the time the event occurred or an image that you have seen since the time of the event?*
  
- b. *Where did you initially see this image?*
  
- c. *When you picture this image, do you imagine it from your own eyes (i.e., as you saw it originally) or do you picture yourself in the image?*

How did you learn of the bombings (please briefly describe; e.g., on TV, from text message, social media etc)?

Who were you with when you learned of the bombings?

What time did you learn about the bombing?

How did you learn of the “shelter-in-place” ordinance (i.e., the instruction many people in the Boston area received to stay in their homes during the search for the bombing suspect; please briefly describe; e.g., on TV, from text message, social media etc)?

Who were you with when you learned of the “shelter-in-place” ordinance?

What time did you learn about the “shelter-in-place” ordinance?

How did you learn of suspect #2’s capture (please briefly describe; e.g., on TV, from text message, social media etc)?

Who were you with when you learned of suspect #2’s capture?

What time did you learn about suspect #2’s capture?

How many people were initially reported injured and killed in the bombings (be as specific as you remember)?

What is the current estimate of number of people reported injured and killed in the bombings (be as specific as you remember)?

What were the initial cities included in the shelter-in-place ordinance?

What additional cities were included in the “shelter-in-place” ordinance over the course of the day?

What transportation changes took place the day of the bombing because of safety concerns?

Before the two suspects were identified, what was correctly or incorrectly reported about who

was responsible for the bombings?

What was discussed about the JFK library during the week of the bombings? Please indicate what is now known to be true vs. false, and what is still uncertain.

What had been discussed about potential, additional "incendiary devices" during the week of the bombings? Please indicate what is now known to be true vs. false, and what is still uncertain.

What was discussed about cell phone service being shut down during the week of the bombings? Please indicate what is now known to be true vs. false, and what is still uncertain.

**Please answer the following questions to the best of your ability:**

How well do you remember the details of the marathon bombing?

1.....2.....3.....4.....5.....6.....7  
remember very little remember everything

How well do you remember the details of the "shelter-in-place" ordinance?

1.....2.....3.....4.....5.....6.....7  
remember very little remember everything

How well do you remember the details of suspect #2's capture?

1.....2.....3.....4.....5.....6.....7  
remember very little remember everything

What was the intensity of your emotional reaction to the marathon bombings?

1.....2.....3.....4.....5.....6.....7  
little reaction very intense

What was the intensity of your emotional reaction to the "shelter-in-place" ordinance?

1.....2.....3.....4.....5.....6.....7  
little reaction very intense

What was the intensity of your emotional reaction to suspect #2's capture?

1.....2.....3.....4.....5.....6.....7  
little reaction very intense

What was your emotional reaction to the marathon bombings?

1.....2.....3.....4.....5.....6.....7  
extremely negative extremely positive

What was your emotional reaction to the "shelter-in-place" ordinance?

1.....2.....3.....4.....5.....6.....7  
extremely negative extremely positive

What was your emotional reaction to suspect #2's capture?

1.....2.....3.....4.....5.....6.....7  
extremely negative extremely positive

To what extent did you feel in imminent personal danger during the day of the bombings?

1.....2.....3.....4.....5.....6.....7  
no personal danger extreme personal danger

To what extent did you feel in imminent personal danger during the days following the marathon bombings?

1.....2.....3.....4.....5.....6.....7  
no personal danger extreme personal danger

To what extent did you feel in imminent personal danger during the “shelter-in-place” ordinance?

1.....2.....3.....4.....5.....6.....7  
no personal danger extreme personal danger

How significant was the marathon bombing to you personally?

1.....2.....3.....4.....5.....6.....7  
mildly significant extremely significant

How significant was the “shelter-in-place” ordinance to you personally?

1.....2.....3.....4.....5.....6.....7  
mildly significant extremely significant

How significant was suspect #2’s capture to you personally?

1.....2.....3.....4.....5.....6.....7  
mildly significant extremely significant

In your opinion, how significant was the marathon bombing to the city of Boston?

1.....2.....3.....4.....5.....6.....7  
mildly significant extremely significant

In your opinion, how significant was the “shelter-in-place” ordinance to the city of Boston?

1.....2.....3.....4.....5.....6.....7  
mildly significant extremely significant

In your opinion, how significant was suspect #2’s capture to the city of Boston?

1.....2.....3.....4.....5.....6.....7  
mildly significant extremely significant

In your opinion, how significant was the marathon bombing to the nation?

1.....2.....3.....4.....5.....6.....7  
mildly significant extremely significant

In your opinion, how significant was the “shelter-in-place” ordinance to the nation?

1.....2.....3.....4.....5.....6.....7  
mildly significant extremely significant









Other (please specify: \_\_\_\_\_)  
1.....2.....3.....4.....5.....6.....7

Are you on Facebook? (circle one; if No, skip to the next question)      No      Yes

If Yes, what were your friends posting (please briefly describe; e.g. information, personal stories, emotional support for people in Boston, etc)? Were these posts primarily positive (e.g., stories of heroics or human strength) or negative (e.g., anger at the bomber or fear)?

If Yes, did you post on Facebook about the bombings?      No      Yes

If Yes, what did you post (please briefly describe; e.g. information, personal stories, emotional support for people in Boston, etc)?

If Yes, how have posts about the bombings changed over the last six months?

Are you on Twitter? (circle one; if No, skip to the next question)      No      Yes

If Yes, what were your friends tweeting (please briefly describe; e.g. information, personal stories, emotional support for people in Boston, etc)? Were these tweets primarily positive (e.g., stories of heroics or human strength) or negative (e.g., anger at the bomber or fear)?

If Yes, did you tweet about the bombings?      No      Yes

If Yes, what did you tweet (please briefly describe; e.g. information, personal stories, emotional support for people in Boston, etc)?

If Yes, how have tweets about the bombings changed over the last six months?

What was the content of phone calls and emails that you received immediately after the bombings (please briefly describe; e.g. information, personal stories, emotional support for people in Boston, etc)? Was this information primarily positive (e.g., stories of heroics or human strength) or negative (e.g., anger at the bomber or fear)?

What were some of the stories of heroism and helping that you remember from the day of the bombing (give a brief description of any you remember)?

What were some of the stories of heroism and helping that you remember from the day of the “shelter-in-place” ordinance (give a brief description of any you remember)?









How much information have you learned about the suspected bombers and their background since they were identified?

Not much at all                      Some Information                      A great deal of information  
1.....2.....3.....4.....5.....6.....7

To what extent did you seek out additional information about the bombers and their background?

What was your first reaction when you learned that one of the bombers was a local college student? Please briefly explain the reason for this reaction.

What was your reaction to the Rolling Stone cover and article about the bomber? Please briefly explain the reason for this reaction.

**The following questions have to do with the *younger* brother (Dzhokhar Tsarnaev):**

To what extent do you believe that the *character* of the younger brother (Dzhokhar) contributed to his involvement in the bombings? (In other words, to what extent do you think his mental and moral qualities contributed to his participation in this type of attack?)

No contribution                      Some contribution                      A major contribution  
1.....2.....3.....4.....5.....6.....7

To what extent do you believe that the *upbringing* of the younger brother (Dzhokhar) contributed to his involvement in the bombings? (In other words, to what extent do you think events and exposures in his childhood and adolescence contributed to his participation in this type of attack?)

No contribution                      Some contribution                      A major contribution  
1.....2.....3.....4.....5.....6.....7

To what extent do you believe that the *immediate life situation* of the younger brother (Dzhokhar), in the days or weeks preceding the attack, contributed to his involvement in the bombings?

No contribution                      Some contribution                      A major contribution  
1.....2.....3.....4.....5.....6.....7

To what extent do you believe that the younger brother (Dzhokhar) *currently* feels remorse for his actions?

No remorse                      Some remorse                      Substantial remorse  
1.....2.....3.....4.....5.....6.....7

To what extent do you believe that the younger brother (Dzhokhar) will *eventually* feel remorse for his actions?

No remorse                      Some remorse                      Substantial remorse  
1.....2.....3.....4.....5.....6.....7

**The following questions have to do with the *older brother* (Tamerlan Tsarnaev):**

To what extent do you believe that the *character* of the older brother (Tamerlan) contributed to his involvement in the bombings? (In other words, to what extent do you think his mental and moral qualities contributed to his participation in this type of attack?)

No contribution                      Some contribution                      A major contribution  
1.....2.....3.....4.....5.....6.....7

To what extent do you believe that the *upbringing* of the older brother (Tamerlan) contributed to his involvement in the bombings? (In other words, to what extent do you think events and exposures in his childhood and adolescence contributed to his participation in this type of attack?)

No contribution                      Some contribution                      A major contribution  
1.....2.....3.....4.....5.....6.....7

To what extent do you believe that the *immediate life situation* of the older brother (Tamerlan), in the days or weeks preceding the attack, contributed to his involvement in the bombings?

No contribution                      Some contribution                      A major contribution  
1.....2.....3.....4.....5.....6.....7

To what extent do you believe that the older brother (Tamerlan) would *currently* feel remorse for his actions, had he survived?

No remorse                                          Some remorse                                          Substantial remorse  
1.....2.....3.....4.....5.....6.....7

To what extent do you believe that the older brother (Tamerlan) would *eventually* feel remorse for his action, had he survived?

No remorse                                          Some remorse                                          Substantial remorse  
1.....2.....3.....4.....5.....6.....7

Please use the space below to share any other information you would like about what you remember about the events surrounding the Boston Marathon bombings.

|                                                                                                                                        |       |           |       |              |       |            |       |              |
|----------------------------------------------------------------------------------------------------------------------------------------|-------|-----------|-------|--------------|-------|------------|-------|--------------|
| Selecting from the list of emotion words below, what were the THREE main emotions that were generated for you by the marathon bombing? | _____ | _____     | _____ | _____        | _____ | _____      |       |              |
|                                                                                                                                        | _____ | inactive  | _____ | happy        | _____ | amused     | _____ | calm         |
|                                                                                                                                        | _____ | energetic | _____ | distressed   | _____ | pleasant   | _____ | confused     |
|                                                                                                                                        | _____ | gloomy    | _____ | anxious      | _____ | relaxed    | _____ | unpleasant   |
|                                                                                                                                        | _____ | cheerful  | _____ | enthusiastic | _____ | interested | _____ | shocked      |
|                                                                                                                                        | _____ | excited   | _____ | worried      | _____ | sad        | _____ | aroused      |
|                                                                                                                                        | _____ | afraid    | _____ | angry        | _____ | nervous    | _____ | disappointed |

Selecting from the list of emotion words below, what were the THREE main emotions that were generated for you by the “shelter-in-place” ordinance?

|       |           |       |              |       |            |       |              |
|-------|-----------|-------|--------------|-------|------------|-------|--------------|
| _____ | inactive  | _____ | happy        | _____ | amused     | _____ | calm         |
| _____ | energetic | _____ | distressed   | _____ | pleasant   | _____ | confused     |
| _____ | gloomy    | _____ | anxious      | _____ | relaxed    | _____ | unpleasant   |
| _____ | cheerful  | _____ | enthusiastic | _____ | interested | _____ | shocked      |
| _____ | excited   | _____ | worried      | _____ | sad        | _____ | aroused      |
| _____ | afraid    | _____ | angry        | _____ | nervous    | _____ | disappointed |

Selecting from the list of emotion words below, what were the THREE main emotions that were

generated for you by suspect #2's capture?

|       |           |       |              |       |            |       |              |
|-------|-----------|-------|--------------|-------|------------|-------|--------------|
| _____ | inactive  | _____ | happy        | _____ | amused     | _____ | calm         |
| _____ | energetic | _____ | distressed   | _____ | pleasant   | _____ | confused     |
| _____ | gloomy    | _____ | anxious      | _____ | relaxed    | _____ | unpleasant   |
| _____ | cheerful  | _____ | enthusiastic | _____ | interested | _____ | shocked      |
| _____ | excited   | _____ | worried      | _____ | sad        | _____ | aroused      |
| _____ | afraid    | _____ | angry        | _____ | nervous    | _____ | disappointed |

Selecting from the list of emotion words below, what were the THREE main emotions that were generated for you by learning of suspect #2's identity?

|       |           |       |              |       |            |       |              |
|-------|-----------|-------|--------------|-------|------------|-------|--------------|
| _____ | inactive  | _____ | happy        | _____ | amused     | _____ | calm         |
| _____ | energetic | _____ | distressed   | _____ | pleasant   | _____ | confused     |
| _____ | gloomy    | _____ | anxious      | _____ | relaxed    | _____ | unpleasant   |
| _____ | cheerful  | _____ | enthusiastic | _____ | interested | _____ | shocked      |
| _____ | excited   | _____ | worried      | _____ | sad        | _____ | aroused      |
| _____ | afraid    | _____ | angry        | _____ | nervous    | _____ | disappointed |
